# Supplementary material
Source: bioRxiv or medRxiv preprint supplement (https://www.biorxiv.org/highwire/filestream/12492/field_highwire_adjunct_files/0/045690-1.pdf)
Supplement: Supplementary file [file 045690-1.pdf]

# Appendices

This appendix includes the following sections.

- 1 Implementation details of the break point finding algorithm
- 2 Data analysis of the Breaker and Merger
- 3 Feasibility of Breaker to recover consistent contigs
- 4 More information on the EM algorithm and the MSA
- 5 Commands used to run various tools
- 6 Detailed Quast reports
- 7 Future work

## Appendix A: Implementation details of the break point finding algorithm

In forming a De Bruijn graph, we use the following method. First, we fill in the hidden end points by inspecting any inconsistent number of end points between repeat copies. In our example of  $x_1 = a[b(c)d]e$ ,  $x_2 = f[bc]g$ ,  $x_3 = h(cd)i$ , we have  $[()]$  as the long ( $\geq 2L$ ) repeat end points. We fill in the hidden end points  $x_1 = a[b(c)d]e$ ,  $x_2 = f[bc]g$ ,  $x_3 = h(c)d]i$  because between  $[]$  there should be a  $)$ , and between  $()$ , there should be a  $]$ . After filling in the hidden end points, we label and cluster the end points. At first, two end points have the same label if they correspond to the same side of the same repeat. Then, we cluster end points that are close to each other to have the same label. With the relabelled end points along each contig, we form a graph. Note that the end points correspond to edges of the graph. In the previous example, let the label of end point of  $[()]$  be 1, 2, 3, 4 respectively, we have the edge sequences of  $x_1, x_2, x_3$  being (1, 2, 3, 4), (1, 2, 3), (2, 3, 4). And we will append beginning and ending edge to the sequences, so the actual edge sequences of  $x_1, x_2, x_3$  are  $(b_1, 1, 2, 3, 4, e_1)$ ,  $(b_2, 1, 2, 3, e_2)$ ,  $(b_3, 2, 3, 4, e_3)$ . Next, we need to find the nodes. This can be done by scanning for successive end points in the edge sequences. Any two successive end points define a node. And if they do not correspond to a closed end point followed by an open end point, it is considered as a repeat node. For example, (1, 2) is a repeat node, and  $(b_1, 1)$  is a non-repeat node. Now we note that from the repeat nodes, we can gather together the edges to form the graph. For example, the incoming edges of node (1, 2) are the two end points corresponding to 1 and outgoing edges of the node (1, 2) are the two end points corresponding to 2. In order to handle double stranded nature of the genome, when scanning the edge sequences, we search both forward and backward to identify the nodes. The approximate nature of matching is handled when we cluster end points close to each other.

## Appendix B: Data analysis of the Breaker and Merger

We perform independent data analysis of the performance of Breaker and Merger of BIGMAC. We note that we both use QUAST and an independent evaluation (which is implemented by us) from QUAST. Users can use our evaluation scripts to evaluate the performance of their own improvement as well. We note that the dataset 1,2,3 are those studied in the experiment section and the dataset 0 is the synthetic dataset.

### B.1 Quast reports

The Breaker only and BIGMAC end-to-end results are tabulated as follows. We note that Breaker can decrease the number of contigs because it remove redundant contigs after breaking at potentially mis-assembled points. The are located at the QUAST report section.

### B.2 Data analysis on Breaker

We measure mis-assemblies fixing capability of Breaker. Specifically, we study the performance of ChimericContigFixing(Palindrome) and the combination of LocatePotentialMisassemblies and ConfirmBreakPoints (Repeat&Coverage). We map the contigs back to the ground truth to see if the segments mapped to different locations. We note that our method is more stringent that QUAST. Even in the cases of repeat, we only map the segment to the best matched location. Thus, occasionally, a FP may not be a real false positive. The script can be run as `python -m srcRefactor.evalmfixer foldername mummerpath` The precision and recall on the subcomponents are as follows.

Table 4: Breaker Evaluation

| Dataset | Break point detector | Precision | Recall   | Number of TP | Number of FP |
|---------|----------------------|-----------|----------|--------------|--------------|
| 0       | Palindrome           | 1         | 0        | 0            | 0            |
| 0       | Repeat&Coverage      | 1         | 1        | 2            | 0            |
| 1       | Palindrome           | 1         | 0        | 0            | 0            |
| 1       | Repeat&Coverage      | 0.102041  | 0.483871 | 15           | 132          |
| 2       | Palindrome           | 0.605556  | 0.246606 | 109          | 71           |
| 2       | Repeat&Coverage      | 0.021898  | 0.032967 | 9            | 402          |
| 3       | Palindrome           | 0.818182  | 0.157895 | 9            | 2            |
| 3       | Repeat&Coverage      | 0.142857  | 0.113636 | 5            | 30           |

### B.3 Data analysis on Merger

To evaluation, we collect data from graphsurgery merges(when condensing edges), BRepeat merges(when repeat node is not a separate node) and XRepeat merges(when repeat node is a separate node). We map back to reference to identify correct successors. Then we report the percentage left. The scripts can be run as `python -m srcRefactor.evalasplitter foldername mummerpath` The precision and recall on the subcomponents are as follows. Note that we are more stringent than QUAST, because if two are not immediate successors then we report as FP here. Also, we use best match on the reference, meaning that repeat can be mapped to more than one location, thus a FP may not really be a FP. So, the number reported only serves as an approximation here. We note that we have duplicated tje contigs to handle reverse complements, so all numbers are approximately double of the actual number, with some offset due to slight variation due to tie-breaking in the alignment tool.

## Appendix C: Feasibility of Breaker to recover consistent contigs

In this section, we study why Breaker can recover contigs by modelling the mis-assemblies formed by an upstream assembler

We define the ground truth to be  $S_0 = \{s_1, s_2, \dots, s_n\}$  which is a set of strings with alphabets taken from  $\Sigma = \{A, C, G, T\}$ . Now we specify their repeat structures as follows. Let  $x, y$  be length  $L$  substrings of  $s_i, s_j$  respectively, where  $i \neq j$  and

Table 5: Merger Evaluation

| Dataset | Merger subroutine | precision | recall   | TP_num | FP_num |
|---------|-------------------|-----------|----------|--------|--------|
| 0       | GraphSurgery      | 1         | 0        | 0      | 0      |
| 0       | BResolve          | 1         | 1        | 4      | 0      |
| 0       | XResolve          | 1         | 0        | 0      | 0      |
| 1       | GraphSurgery      | 0.829268  | 0.164251 | 68     | 14     |
| 1       | BResolve          | 0.745455  | 0.099034 | 41     | 14     |
| 1       | XResolve          | 0.823529  | 0.033816 | 14     | 3      |
| 2       | GraphSurgery      | 0.741379  | 0.076512 | 43     | 15     |
| 2       | BResolve          | 0.384615  | 0.008897 | 5      | 8      |
| 2       | XResolve          | 0.250000  | 0.001779 | 1      | 3      |
| 3       | GraphSurgery      | 0.235294  | 0.090909 | 4      | 13     |
| 3       | BResolve          | 0.333333  | 0.045455 | 2      | 4      |
| 3       | XResolve          | 1.000000  | 0.022727 | 1      | 0      |

$L > 2$ . If  $\forall 1 < k < L, x[k] = y[k]$  and  $x[1] \neq y[1], x[L] \neq y[L]$ , then we call  $(x, y)$  be a maximal exact repeat of length  $L - 2$ . Although this notion of maximal exact repeat can be generalized to the same string, for simplicity of discussion, we assume they are extracted from different strings. We fix  $K_0$  to be a large constant which is related to the length of the reads and assume that there are only  $r$  maximal exact repeats of length  $> K_0$ .

Next, we model the upstream assembler's mis-assembly formation process by the following sequence of operations of strings. Let  $\{T_j\}_{1 \leq j \leq m}$  be a sequence of operations that act on strings  $S_0$  and form  $\{S^{(j)}\}_{1 \leq j \leq m}$  successively. That is,  $S^{(0)} = S_0$  and  $1 \leq j \leq m, S^{(j)} = T_j(S^{(j-1)})$ . Now, we specify the action of  $T_j$ . It picks two arbitrary strings with a maximal repeat of length  $\geq K_0$ . Then, it breaks at the start of the repeat and joins the corresponding string at the breakpoint. Symbolically, let  $T$  operate on two strings  $s = axb, t = cxd$ , where the common segment is  $x$  and the breakpoint is the position immediately before  $x$ . The resultant strings are  $s' = axd, t' = cxb$ . We further assume that each string under the operations does not have repeat within itself of length  $> K_0$ .

Under this setting, we prove the following theorem.

**Theorem C.1** *Given  $S^{(m)}$  generated from  $S_0 = \{s_i\}_{1 \leq i \leq n}$  after successive operations by  $\{T_j\}_{1 \leq j \leq m}$ , we can recover a set of strings  $W$  of cardinality at most  $n + 4r$  such that  $W$  is consistent with  $S_0$  (i.e. for each string  $w \in W$ ,  $w$  is a substring of some string  $s \in S_0$ ).*

*Proof* The way to construct the set  $W$  is as follows. We first identify all maximal exact repeats across the strings in  $S^{(m)}$ . We then break the strings at every endpoints of each of these maximal exact repeats. Now, it remains to show that 1) there are at most  $n + 4r$  strings in  $W$  and 2) they are consistent with the ground truth.

To show them, we use the following bookkeeping method. Let us assign a unique label to each position at each string in the ground truth  $S_0$ . Let the set of all the labels be  $B$  and the mapping from  $B$  to string index and offset be  $f_0$ . At the beginning, we define  $\Phi_0$  as the labels that are the endpoints of any maximal exact repeat of length  $> K_0$ . That is,  $\Phi_0 = \{a \in B \mid a \text{ corresponds to an endpoint of some maximal exact repeat of length } > K_0 \text{ in } S^{(0)}\}$ . When we apply  $T_j$  on the strings, let  $x$  be the repeat. We move

both the segment and the associated labels to the other string starting at the left endpoint of  $x$ . The exceptions are the labels within the repeat  $x$  which are associated with some right endpoints of another repeat  $x'$  that has left endpoint before  $x$ . We keep those labels at the original positions. Since the set of labels remains invariant, and they correspond to a bijection,  $f_j$ , from  $B$  to string position at each stage after  $T_j$ , we can define  $\Phi_j = \{a \in B \mid a \text{ corresponds to an endpoint of some maximal exact repeat of length } > K_0 \text{ in } S^{(j)}\}$

We consider the simple case when initially no two pairs of repeat copies overlap at exactly one point (otherwise, we just need to generalize our book keeping scheme by introducing multiple labels at those points). In that case, it turns out that  $\Phi_j$  is invariant (i.e.  $\Phi_j = \Phi_0$  for all  $j$ ), which we will prove in a separate Lemma. With this Lemma, then we can show the theorem follows.

We first show that  $W$  is consistent with  $S_0$ . We note that for each  $T_j$ , if we mark the label of the junction as  $b_j$  and break them, then the resulting set of string will be consistent throughout. But since  $b_j \in \Phi_j$  and  $\bigcup_j \{b_j\} \subset \bigcup_j \Phi_j = \Phi_m = \Phi_0$ , it suffices to break at every position corresponding to  $\Phi_m$  in  $S^{(m)}$  to obtain consistent strings. Moreover,  $|\Phi_m| = |\Phi_0| \leq 4r$ . So, if we break at every position corresponding to  $\Phi_m$  in  $S^{(m)}$ , we have at most  $n + 4r$  resultant strings. This gives,  $|W| \leq n + 4r$ .  $\square$

**Lemma C.2** *If  $0 \leq j \leq m$ , we have  $\Phi_j = \Phi_0$ .*

*Proof* We consider  $j = 1$  and inductively, the lemma follows. Without loss of generality, we assume  $s_1, s_2$  are the strings that  $T_1$  acts on and the associated repeat is  $x$ .

If  $T_1$  can cause an element  $b \in B$  to enter or leave  $\Phi_1$ , it could only belong to a maximal repeat that includes a copy of  $x$ . Otherwise the labels and the moving segment, which include that potential repeat segment, are moved together. Thus, there cannot be any creation/destruction of maximal exact repeats. We will show that, even for those repeats that include a copy of  $x$ , their endpoints are still invariant. Without loss of generality, we take the suspicious repeat to end at the right endpoint of  $s_1$ . There are two cases that can cause changes in  $\Phi_1$  upon  $T_1$ . These include getting a bigger maximal repeat or getting a big repeat separated into smaller pieces with a third string. Since we assume that we cannot have a repeat of length  $\geq K_0$  on the same string in the sequence of operations, the third string cannot be  $s_1$  or  $s_2$ . They correspond to a  $T_1$  that goes either from left to right or right to left in Fig 4. We enumerate the pairwise maximal repeats as shown in Fig 4. It turns out that in both cases, the set of associated repeat endpoints is invariant. This concludes the proof that  $\Phi_1 = \Phi_0$   $\square$

## Appendix D: More information on the EM algorithm and the MSA

In this section, we discuss about the details of the EM algorithm used and related materials.

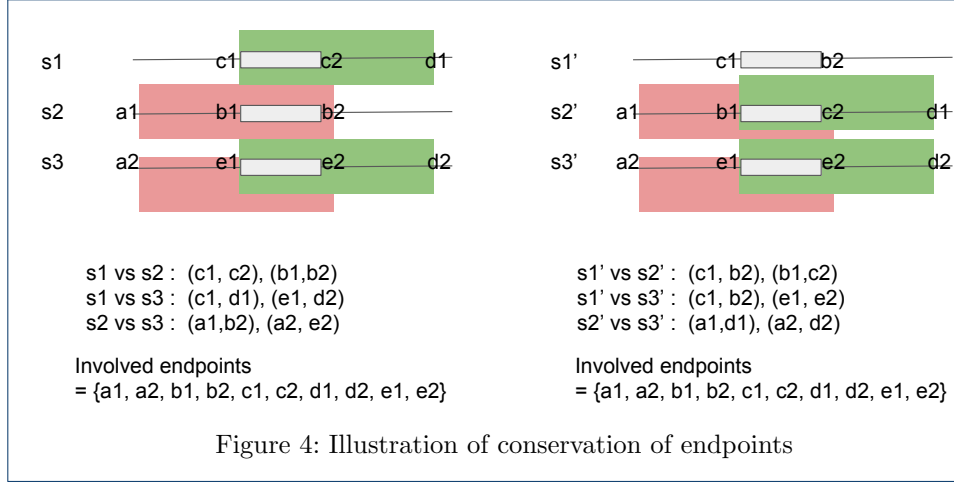

### D.1 Derivation of the EM algorithm

$$\begin{aligned}
 & \log P_\theta(X, Z) \\
 &= \log \prod_{1 \leq i \leq n} P_\theta(R_i, Z_i) \\
 &= \sum_{1 \leq i \leq n} \log P_\theta(R_i, Z_i) \\
 &= \sum_{1 \leq i \leq n} \log \prod_{1 \leq j \leq k} (\lambda_j P(R_i | Z_i = j))^{1_{Z_i=j}} \\
 &= \sum_{1 \leq i \leq n} \sum_{1 \leq j \leq k} 1_{Z_i=j} [\log \lambda_j - \log \ell_j + \log(q^{d(R_i, I_j)} (1 - 2q)^{L-d(R_i, I_j)})] \\
 &= \sum_{1 \leq i \leq n} \sum_{1 \leq j \leq k} 1_{Z_i=j} [\log \lambda_j - \log \ell_j + d(R_i, I_j) \log \frac{q}{1 - 2q} + L \log(1 - 2q)]
 \end{aligned}$$

Thus, after taking expectation, we get  $E_{q(z|x, \theta^t)}[\ell(x, Z, \theta^{t+1})]$  as desired.

### D.2 Feasibility of MSA in our setting

Note that when we only have substitution noise and if all the  $R_i$  originates from the same genomic location, the problem of  $\min_x \sum d(x, R_i)$  can be readily solved by a majority vote. We expect similar results regarding indel noise. However, we need to pre-process with an alignment phase before the majority vote. We thus introduce Algorithm majority-consensus-star-alignment.

- 1 Compute alignment of  $R_1$  and  $R_j$  where  $j \geq 2$
- 2 for  $j = 2$  to  $n$ , use the alignment of  $R_1$  and  $R_j$  to form introduce gaps to previous alignment with the principle of "once a gap always a gap"
- 3 Take column-wise majority to form  $x^*$
- 4 return  $x^*$

We note that in the alignment, we use the scoring scheme of (1, -1, -1, -10) for match, insertion, deletion, substitution. It is because pure substitution noise is rare in current long read technology. We also note that when there is a run of alphabet, we will push the gap towards the end of the alignment. For example CCAAATT is aligned to CCAA TT.

**Theorem D.1** *Let  $\{R_i\}_{1 \leq i \leq n}$  be a set of string with alphabets in  $\{A, C, G, T\}$  of length  $\{\ell(R_i)\}_{1 \leq i \leq n}$  where  $\ell(R_i) > n > 5$ . If  $\forall i \neq j, d(R_i, R_j) = 2$  and  $\exists x^*$  such that  $\forall i, d(x^*, R_i) = 1$  then the majority-consensus-star-alignment can find the optimizer of  $\min_x \sum d(x, R_i)$ .*

*Proof* We can break it down into the following three steps. A high level intuition is that we are randomly placing an error on  $R_i$  generated from the same source, so, a simple majority vote should just work after doing an initial alignment.

- 1 Note that  $x^*$  is the optimizer. If we define  $R_{n+1} = R_1$ , we have,  $\forall x, \sum_{1 \leq i \leq n} d(x, R_i) = \frac{1}{2} \sum_{1 \leq i \leq n} [d(x, R_i) + d(x, R_{i+1})] \geq \frac{1}{2} \sum_{1 \leq i \leq n} d(R_i, R_{i+1}) = n$  But since  $\sum_{1 \leq i \leq n} d(x^*, R_i) = \sum_{1 \leq i \leq n} 1 = n$ , we know that  $x^*$  is the optimizer.
- 2 Second, we assume we input the ground truth  $x^*$  as a read, we will find that the algorithm give  $x^*$  as the output.

The reason is as follows. Let  $e_i$  be the edit introduced by  $R_i$  when aligned to  $x^*$ . Note that  $e_i \neq e_j$  if  $i \neq j$  otherwise,  $d(R_i, R_j) = 0$ . So, it means that  $e_i$  cannot win the majority vote at the end because  $n \geq 6$  and  $|\{A, C, G, T, -\}| = 5$ , so entry at  $x^*$  will be voted instead.

- 3 Finally, we find that the alignment with  $x^*$  is the same as that without it as input.

The reason is as follows. We have the notation of  $M(A, B)$  as the alignment of A and B when  $x^*$  is the first input, and  $M_S(A, B)$  as the alignment of A and B when  $x^*$  is the input. We claim that a small lemma, which says that  $\forall j, M(R_1, R_j) = M_S(R_1, R_j)$ . Note that it suffices because no gaps are introduced without conflicting some  $R_i$ . Then with the lemma, we have alignment of every reads be identical with and without  $x^*$ , and by step 1 and 2, we know that the algorithm will output the right optimizer. Now we proceed to show the lemma. First note  $e_i$  corresponds to edit on  $x^*$  for  $R_i$ . Recall that,  $e_i$  has to be distinct due to  $d(R_i, R_j) = 2$ . Now consider, without loss of generality,  $e_1, e_2$  and their corresponding location when  $x^*$  is the input. We define runs of alphabets that  $e_i$  lands on under  $M_S$  as  $r_i$ . Now, we exhaust the cases on  $r_i$ .

- (a) There exists at least one other run between  $r_1$  and  $r_2$ . For example, AAAA-CCCTTT vs AAA-CCCTT-. Since putting  $e_1, e_2$  on  $M_S$  gives two edits between  $r_1, r_2$ , we cannot shift the alphabets at the middle to give the same edit distance. This means that the same alignment shows up under  $M$  so as to conserve the same edit distance. Moreover, as the - is always put to the end of run, we will have that consistent under both  $M_S$  and  $M$  too.
- (b)  $r_1, r_2$  are neighboring runs. For example, CCC-TTT vs CCCCTT-. Shifting of run at  $r_1, r_2$  will cause substitution error, so it is not used under  $M_S$ . Thus,  $r_1, r_2$  will have the same alignment too under  $M$  to conserve the edit distance of 2.
- (c)  $r_1, r_2$  are on the same run. For example, CCCC- vs CCCCC while  $x^*$  gives CCCC-. Since the - is always put at the end of the run, we have the alignment conserved under  $M$  and  $M_S$ .

□

We note that, in our implementation of BIGMAC, we use ClustalW2[16] to do the core of multiple sequence alignment. We first use MUMmer to get a rough anchors of the reads and then we chop up the reads into smaller Kmers. Then, we group the related Kmers together use ClustalW2 to do the multiple sequence alignment.

### D.3 An interesting repeat

There is an interesting case which can justify why we need the EM algorithm for some tough cases. Consider the situation in Fig 5. The correct matching is the one that follows row by row. However, there exists matching at the interior such that the polymorphic sites are still consistent (as shown in the figure). Moreover, if we only consider abundance information alone, this repeat cannot be resolved as well (in the sense that we cannot find the correct matching). However, if we consider both the abundances and the polymorphism together during the decision making, we can identify the correct linkage. That is why we introduce the parameter formulation to incorporate both of these quantities.

Figure 5: An example regarding why it requires abundances and edit distance should be considered together

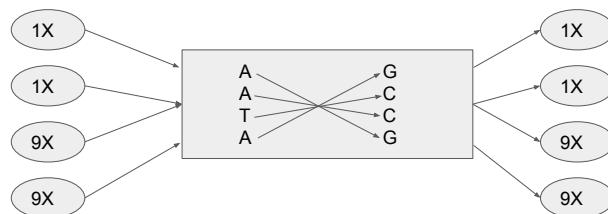

## Appendix E: Commands for datasets

Commands for using BIGMAC on synthetic data and real data are all based on the following commands.

```
$ python -m srcRefactor.misassemblyFixerLib.mFixer destF mPath
$ python -m srcRefactor.repeatPhaserLib.aSplitter destF mPath
```

FinisherSC, SSPACE\_LongRead and PBJelly are run at their default settings. In particular, the commands used to run them are as follows.

```
FinisherSC :  
$ python finisherSC.py dest mPath
```

```
PBJelly :  
$ Jelly.py setup Protocol.xml  
$ Jelly.py mapping Protocol.xml  
$ Jelly.py support Protocol.xml  
$ Jelly.py extraction Protocol.xml  
$ Jelly.py assembly Protocol.xml  
$ Jelly.py output Protocol.xml
```

```
SSPACE\LongRead :  
$ perl SSPACE-LongRead.pl -t 20 -c LC.fasta -p LR.fasta -b e2e/
```

The protocol.xml has the following setting for BLASR, `<blasr>-minMatch 8 -minPctIdentity 70 -bestn 1 -nCandidates 20 -maxScore -500 -nproc 20 -noSplitSubreads</blasr>`

Moreover, we note that you can reproduce results regarding BIGMAC by running `python reproduce.py` to download data, dependencies and run the tools. The results is saved in `allinone.txt`

## Appendix F: Detailed Quast reports

The Quast reports for various comparison for synthetic data and dataset 1,2,3 are in the following tables.

## Appendix G: Future work

It would be interesting to apply similar ideas to hybrid data. Moreover, it would also be interesting to investigate the optimal way to use abundance information.



Table 6: Synthetic data (Comparison with Breaker only and HGAP results). All statistics are based on contigs of size  $\geq 500$  bp, unless otherwise noted (e.g., "# contigs ( $\geq 0$  bp)" and "Total length ( $\geq 0$  bp)" include all contigs).

| Assembly                       | Original        | Breaker only    | BIGMAC end-to-end |
|--------------------------------|-----------------|-----------------|-------------------|
| # contigs ( $\geq 0$ bp)       | <b>2</b>        | 4               | <b>2</b>          |
| # contigs ( $\geq 1000$ bp)    | <b>2</b>        | 4               | <b>2</b>          |
| Total length ( $\geq 0$ bp)    | <b>10000000</b> | <b>10000000</b> | 9999992           |
| Total length ( $\geq 1000$ bp) | <b>10000000</b> | <b>10000000</b> | 9999992           |
| # contigs                      | <b>2</b>        | 4               | <b>2</b>          |
| Largest contig                 | <b>5000000</b>  | 2512000         | 4999998           |
| Total length                   | <b>10000000</b> | <b>10000000</b> | 9999992           |
| Reference length               | 10000000        | 10000000        | 10000000          |
| GC (%)                         | 50.01           | 50.01           | 50.01             |
| Reference GC (%)               | 50.01           | 50.01           | 50.01             |
| N50                            | <b>5000000</b>  | 2512000         | 4999998           |
| NG50                           | <b>5000000</b>  | 2512000         | 4999994           |
| N75                            | <b>5000000</b>  | 2488000         | 4999994           |
| NG75                           | <b>5000000</b>  | 2488000         | 4999994           |
| L50                            | <b>1</b>        | 2               | <b>1</b>          |
| LG50                           | <b>1</b>        | 2               | <b>2</b>          |
| L75                            | <b>2</b>        | 3               | <b>2</b>          |
| LG75                           | <b>2</b>        | 3               | <b>2</b>          |
| # misassemblies                | 2               | 0               | 0                 |
| # misassembled contigs         | 2               | 0               | 0                 |
| Misassembled contigs length    | 10000000        | 0               | 0                 |
| # local misassemblies          | 0               | 0               | 0                 |
| # unaligned contigs            | 0 + 0 part      | 0 + 0 part      | 0 + 0 part        |
| Unaligned length               | 0               | 0               | 0                 |
| Genome fraction (%)            | 100.000         | 100.000         | 100.000           |
| Duplication ratio              | 1.000           | 1.000           | 1.000             |
| # N's per 100 kbp              | 0.00            | 0.00            | 0.00              |
| # mismatches per 100 kbp       | <b>0.00</b>     | <b>0.00</b>     | 0.05              |
| # indels per 100 kbp           | <b>0.00</b>     | <b>0.00</b>     | 2.38              |
| Largest alignment              | 2512000         | 2512000         | <b>4999998</b>    |
| NA50                           | 2512000         | 2512000         | <b>4999998</b>    |
| NGA50                          | 2512000         | 2512000         | <b>4999994</b>    |
| NA75                           | 2488000         | 2488000         | <b>4999994</b>    |
| NGA75                          | 2488000         | 2488000         | <b>4999994</b>    |
| LA50                           | 2               | 2               | <b>1</b>          |
| LGA50                          | 2               | 2               | <b>2</b>          |
| LA75                           | 3               | 3               | <b>2</b>          |
| LGA75                          | 3               | 3               | <b>2</b>          |

Table 7: Dataset 1 (Comparison with Breaker only and HGAP results): All statistics are based on contigs of size  $\geq 500$  bp, unless otherwise noted (e.g., "# contigs ( $\geq 0$  bp)" and "Total length ( $\geq 0$  bp)" include all contigs).

| Assembly                       | Original        | Breaker only  | BIGMAC end-to-end |
|--------------------------------|-----------------|---------------|-------------------|
| # contigs ( $\geq 0$ bp)       | <b>130</b>      | 199           | 131               |
| # contigs ( $\geq 1000$ bp)    | 130             | 197           | <b>129</b>        |
| Total length ( $\geq 0$ bp)    | <b>30499818</b> | 29452892      | 29273543          |
| Total length ( $\geq 1000$ bp) | <b>30499818</b> | 29452752      | 29273403          |
| # contigs                      | 130             | 197           | <b>129</b>        |
| Largest contig                 | <b>8887616</b>  | 8615553       | 8615553           |
| Total length                   | <b>30499818</b> | 29452752      | 29273403          |
| Reference length               | 30128987        | 30128987      | 30128987          |
| GC (%)                         | 56.54           | 57.45         | 57.68             |
| Reference GC (%)               | 56.98           | 56.98         | 56.98             |
| N50                            | 818655          | 758280        | <b>4352719</b>    |
| NG50                           | 1595590         | 567256        | <b>4352719</b>    |
| N75                            | <b>274801</b>   | 157172        | <b>274801</b>     |
| NG75                           | <b>277114</b>   | 132279        | 256020            |
| L50                            | 4               | 4             | <b>3</b>          |
| LG50                           | <b>3</b>        | 5             | <b>3</b>          |
| L75                            | 23              | 28            | <b>14</b>         |
| LG75                           | 22              | 32            | <b>16</b>         |
| # misassemblies                | 18              | 4             | 7                 |
| # misassembled contigs         | 15              | 4             | 7                 |
| Misassembled contigs length    | 16357196        | <b>536534</b> | 1785642           |
| # local misassemblies          | <b>6</b>        | <b>6</b>      | 9                 |
| # unaligned contigs            | 0 + 0 part      | 0 + 0 part    | 0 + 0 part        |
| Unaligned length               | 0               | 0             | 0                 |
| Genome fraction (%)            | <b>98.189</b>   | 96.217        | 96.325            |
| Duplication ratio              | 1.033           | 1.016         | <b>1.010</b>      |
| # N's per 100 kbp              | 0.00            | 0.00          | 0.00              |
| # mismatches per 100 kbp       | 33.76           | <b>22.38</b>  | 44.80             |
| # indels per 100 kbp           | 7.13            | <b>5.40</b>   | 63.44             |
| Largest alignment              | <b>8631596</b>  | 8615553       | 8615553           |
| NA50                           | 758280          | 758280        | <b>4351628</b>    |
| NGA50                          | 758280          | 567256        | <b>4351628</b>    |
| NA75                           | 227835          | 148337        | <b>262515</b>     |
| NGA75                          | <b>254545</b>   | 132279        | 181075            |
| LA50                           | 5               | 4             | <b>3</b>          |
| LGA50                          | 5               | 5             | <b>3</b>          |
| LA75                           | 26              | 29            | <b>14</b>         |
| LGA75                          | 25              | 32            | <b>17</b>         |

Table 8: Dataset 2 (Comparison with Breaker only and HGAP results). All statistics are based on contigs of size  $\geq 500$  bp, unless otherwise noted (e.g., "# contigs ( $\geq 0$  bp)" and "Total length ( $\geq 0$  bp)" include all contigs).

| Assembly                       | Original        | Breaker only   | BIGMAC end-to-end  |
|--------------------------------|-----------------|----------------|--------------------|
| # contigs ( $\geq 0$ bp)       | 477             | 382            | <b>351</b>         |
| # contigs ( $\geq 1000$ bp)    | 477             | 371            | <b>341</b>         |
| Total length ( $\geq 0$ bp)    | <b>32897488</b> | 29572416       | 29605579           |
| Total length ( $\geq 1000$ bp) | <b>32897488</b> | 29569477       | 29603092           |
| # contigs                      | 477             | 374            | <b>344</b>         |
| Largest contig                 | 4673711         | 4673711        | 4673711            |
| Total length                   | <b>32897488</b> | 29571716       | 29605331           |
| Reference length               | 66662626        | 66662626       | 66662626           |
| GC (%)                         | 47.38           | 48.81          | 48.80              |
| Reference GC (%)               | 46.01           | 46.01          | 46.01              |
| N50                            | <b>397611</b>   | 354308         | <b>397611</b>      |
| N75                            | 38471           | 59190          | <b>75666</b>       |
| L50                            | <b>9</b>        | 13             | 12                 |
| L75                            | 101             | 70             | <b>57</b>          |
| # misassemblies                | 187             | <b>25</b>      | 28                 |
| # misassembled contigs         | 176             | <b>21</b>      | 22                 |
| Misassembled contigs length    | 18192123        | <b>8079336</b> | 8582043            |
| # local misassemblies          | 22              | <b>18</b>      | 19                 |
| # unaligned contigs            | 39 + 7 part     | 30 + 7 part    | <b>29 + 8 part</b> |
| Unaligned length               | 1646412         | <b>982915</b>  | 993710             |
| Genome fraction (%)            | 41.946          | 41.941         | <b>41.995</b>      |
| Duplication ratio              | 1.118           | 1.023          | <b>1.022</b>       |
| # N's per 100 kbp              | 0.00            | 0.00           | 0.00               |
| # mismatches per 100 kbp       | <b>1.58</b>     | 1.97           | 8.68               |
| # indels per 100 kbp           | <b>8.63</b>     | 9.02           | 37.15              |
| Largest alignment              | 4547258         | 4547258        | 4547258            |
| NA50                           | <b>369454</b>   | 333580         | <b>369454</b>      |
| NA75                           | 32926           | 47209          | <b>56711</b>       |
| LA50                           | <b>12</b>       | 15             | 14                 |
| LA75                           | 123             | 81             | <b>68</b>          |

Table 9: Dataset 3 (Comparison with Breaker only and HGAP results). All statistics are based on contigs of size  $\geq 500$  bp, unless otherwise noted (e.g., "# contigs ( $\geq 0$  bp)" and "Total length ( $\geq 0$  bp)" include all contigs).

| Assembly                       | Original        | Breaker only   | BIGMAC end-to-end   |
|--------------------------------|-----------------|----------------|---------------------|
| # contigs ( $\geq 0$ bp)       | 185             | 154            | <b>145</b>          |
| # contigs ( $\geq 1000$ bp)    | 185             | 149            | <b>140</b>          |
| Total length ( $\geq 0$ bp)    | <b>17393660</b> | 13844743       | 13912664            |
| Total length ( $\geq 1000$ bp) | <b>17393660</b> | 13843875       | 13911796            |
| # contigs                      | 185             | 149            | <b>140</b>          |
| Largest contig                 | 3968563         | 3968563        | 3968563             |
| Total length                   | <b>17393660</b> | 13843875       | 13911796            |
| Reference length               | 7883268         | 7883268        | 7883268             |
| GC (%)                         | 61.18           | 60.96          | 60.98               |
| Reference GC (%)               | 61.71           | 61.71          | 61.71               |
| N50                            | 257044          | <b>359704</b>  | <b>359704</b>       |
| NG50                           | 3968563         | 3968563        | 3968563             |
| N75                            | 82370           | 82649          | <b>99878</b>        |
| NG75                           | <b>3924590</b>  | 474671         | 517104              |
| L50                            | 5               | 7              | 7                   |
| LG50                           | 1               | 1              | 1                   |
| L75                            | 38              | 29             | <b>27</b>           |
| LG75                           | <b>2</b>        | 5              | 5                   |
| # misassemblies                | 26              | <b>11</b>      | 14                  |
| # misassembled contigs         | 20              | <b>5</b>       | 5                   |
| Misassembled contigs length    | 5470082         | <b>4234268</b> | 4328506             |
| # local misassemblies          | 2               | 2              | 2                   |
| # unaligned contigs            | 118 + 0 part    | 121 + 1 part   | <b>115 + 2 part</b> |
| Unaligned length               | 5585886         | <b>5543409</b> | 5553281             |
| Genome fraction (%)            | <b>99.983</b>   | 99.982         | 99.982              |
| Duplication ratio              | 1.498           | <b>1.053</b>   | 1.060               |
| # N's per 100 kbp              | 0.00            | 0.00           | 0.00                |
| # mismatches per 100 kbp       | <b>0.18</b>     | 0.24           | 2.30                |
| # indels per 100 kbp           | <b>8.70</b>     | 22.88          | 23.60               |
| Largest alignment              | <b>3924590</b>  | 1719755        | 1719755             |
| NA50                           | 137772          | <b>284436</b>  | <b>284436</b>       |
| NGA50                          | <b>1719755</b>  | 569978         | 576251              |
| NGA75                          | <b>1452284</b>  | 474671         | 517104              |
| LA50                           | 11              | <b>10</b>      | <b>10</b>           |
| LGA50                          | <b>2</b>        | 4              | 4                   |
| LGA75                          | <b>3</b>        | 7              | 7                   |

Table 10: Dataset 1 (Comparison with other tools) : All statistics are based on contigs of size  $\geq 500$  bp, unless otherwise noted (e.g., "# contigs ( $\geq 0$  bp)" and "Total length ( $\geq 0$  bp)" include all contigs).

| Assembly                       | original          | BIGMAC            | finisherSC_e2e    | jelly_e2e       | SSPACE_e2e        |
|--------------------------------|-------------------|-------------------|-------------------|-----------------|-------------------|
| # contigs ( $\geq 0$ bp)       | 130               | 131               | <b>53</b>         | 100             | 86                |
| # contigs ( $\geq 1000$ bp)    | 130               | 129               | <b>53</b>         | 100             | 86                |
| Total length ( $\geq 0$ bp)    | 30499818          | 29273543          | 29883342          | <b>30619263</b> | 30589751          |
| Total length ( $\geq 1000$ bp) | 30499818          | 29273403          | 29883342          | <b>30619263</b> | 30589751          |
| # contigs                      | 130               | 129               | <b>53</b>         | 100             | 86                |
| Largest contig                 | 8887616           | 8615553           | 8887616           | <b>8889022</b>  | 8887616           |
| Total length                   | 30499818          | 29273403          | 29883342          | <b>30619263</b> | 30589751          |
| Reference length               | 30128987          | 30128987          | 30128987          | 30128987        | 30128987          |
| GC (%)                         | 56.54             | 57.68             | 57.14             | 56.54           | 56.54             |
| Reference GC (%)               | 56.98             | 56.98             | 56.98             | 56.98           | 56.98             |
| N50                            | 818655            | 4352719           | 2531294           | 4642330         | <b>4657611</b>    |
| NG50                           | 1595590           | 4352719           | 2531294           | 4642330         | <b>4657611</b>    |
| N75                            | 274801            | 274801            | 415024            | 418480          | <b>493683</b>     |
| NG75                           | 277114            | 256020            | 399053            | <b>818655</b>   | <b>818655</b>     |
| L50                            | 4                 | <b>3</b>          | <b>3</b>          | <b>3</b>        | <b>3</b>          |
| LG50                           | 3                 | 3                 | 3                 | 3               | 3                 |
| L75                            | 23                | 14                | 12                | <b>6</b>        | <b>6</b>          |
| LG75                           | 22                | 16                | 13                | <b>5</b>        | <b>5</b>          |
| # misassemblies                | 18                | <b>7</b>          | 32                | 19              | 32                |
| # misassembled contigs         | 15                | <b>7</b>          | 23                | 16              | 20                |
| Misassembled contigs length    | 16357196          | <b>1785642</b>    | 20096169          | 21804531        | 17545253          |
| # local misassemblies          | 6                 | 9                 | 11                | 9               | 36                |
| # unaligned contigs            | <b>0 + 0 part</b> | <b>0 + 0 part</b> | <b>0 + 0 part</b> | 0 + 11 part     | <b>0 + 0 part</b> |
| Unaligned length               | 0                 | 0                 | 0                 | 33217           | 0                 |
| Genome fraction (%)            | 98.189            | 96.325            | 98.330            | <b>98.423</b>   | 98.189            |
| Duplication ratio              | 1.033             | <b>1.010</b>      | 1.030             | 1.034           | 1.037             |
| # N's per 100 kbp              | <b>0.00</b>       | <b>0.00</b>       | <b>0.00</b>       | <b>0.00</b>     | 294.00            |
| # mismatches per 100 kbp       | <b>33.76</b>      | 44.80             | 73.10             | 34.06           | 33.96             |
| # indels per 100 kbp           | 7.13              | 63.44             | 23.53             | 9.39            | <b>6.69</b>       |
| Largest alignment              | 8631596           | 8615553           | 8631596           | <b>8631646</b>  | 8631596           |
| NA50                           | 758280            | <b>4351628</b>    | 2530093           | 3871007         | 3854031           |
| NGA50                          | 758280            | <b>4351628</b>    | 1537643           | 3871007         | 3854031           |
| NA75                           | 227835            | 262515            | 304665            | <b>361412</b>   | 361362            |
| NGA75                          | 254545            | 181075            | 304665            | <b>414429</b>   | <b>414429</b>     |
| LA50                           | 5                 | <b>3</b>          | <b>3</b>          | <b>3</b>        | <b>3</b>          |
| LGA50                          | 5                 | <b>3</b>          | 4                 | <b>3</b>        | <b>3</b>          |
| LA75                           | 26                | 14                | 16                | <b>8</b>        | <b>8</b>          |
| LGA75                          | 25                | 17                | 16                | <b>7</b>        | <b>7</b>          |

Table 11: Dataset 2 (Comparison with other tools) : All statistics are based on contigs of size  $\geq 500$  bp, unless otherwise noted (e.g., "# contigs ( $\geq 0$  bp)" and "Total length ( $\geq 0$  bp)" include all contigs).

| Assembly                       | original    | BIGMAC         | finisherSC_e2e | jelly_e2e       | SSPACE_e2e         |
|--------------------------------|-------------|----------------|----------------|-----------------|--------------------|
| # contigs ( $\geq 0$ bp)       | 477         | 351            | 447            | 403             | <b>307</b>         |
| # contigs ( $\geq 1000$ bp)    | 477         | 341            | 447            | 403             | <b>307</b>         |
| Total length ( $\geq 0$ bp)    | 32897488    | 29605579       | 32870423       | <b>34484366</b> | 33520228           |
| Total length ( $\geq 1000$ bp) | 32897488    | 29603092       | 32870423       | <b>34484366</b> | 33520228           |
| # contigs                      | 477         | 344            | 447            | 403             | <b>307</b>         |
| Largest contig                 | 4673711     | 4673711        | 4673711        | 4673711         | 4673711            |
| Total length                   | 32897488    | 29605331       | 32870423       | <b>34484366</b> | 33520228           |
| Reference length               | 66662626    | 66662626       | 66662626       | 66662626        | 66662626           |
| GC (%)                         | 47.38       | 48.80          | 47.40          | 46.90           | 47.38              |
| Reference GC (%)               | 46.01       | 46.01          | 46.01          | 46.01           | 46.01              |
| N50                            | 397611      | 397611         | 654163         | <b>1585584</b>  | 1568442            |
| NG50                           | -           | -              | -              | 17013           | 14909              |
| N75                            | 38471       | 75666          | 43018          | 61775           | <b>95133</b>       |
| L50                            | 9           | 12             | 8              | <b>6</b>        | 7                  |
| LG50                           | -           | -              | -              | 329             | 294                |
| L75                            | 101         | 57             | 89             | 65              | <b>45</b>          |
| # misassemblies                | 187         | <b>28</b>      | 192            | 271             | 255                |
| # misassembled contigs         | 176         | <b>22</b>      | 168            | 246             | 165                |
| Misassembled contigs length    | 18192123    | <b>8582043</b> | 18393113       | 24250973        | 23415983           |
| # local misassemblies          | 22          | <b>19</b>      | 22             | 37              | 101                |
| # unaligned contigs            | 39 + 7 part | 29 + 8 part    | 34 + 7 part    | 38 + 23 part    | <b>17 + 5 part</b> |
| Unaligned length               | 1646412     | <b>993710</b>  | 1594170        | 1760782         | 1479235            |
| Genome fraction (%)            | 41.946      | 41.995         | 41.999         | <b>43.521</b>   | 41.946             |
| Duplication ratio              | 1.118       | <b>1.022</b>   | 1.117          | 1.128           | 1.146              |
| # N's per 100 kbp              | <b>0.00</b> | <b>0.00</b>    | <b>0.00</b>    | <b>0.00</b>     | 1857.80            |
| # mismatches per 100 kbp       | <b>1.58</b> | 8.68           | 4.39           | 15.40           | <b>1.58</b>        |
| # indels per 100 kbp           | 8.63        | 37.15          | 16.06          | 71.69           | <b>8.49</b>        |
| Largest alignment              | 4547258     | 4547258        | 4547258        | 4547258         | 4547258            |
| NA50                           | 369454      | 369454         | 401563         | <b>742006</b>   | 737193             |
| NA75                           | 32926       | <b>56711</b>   | 33995          | 46245           | 42004              |
| LA50                           | 12          | 14             | 11             | <b>9</b>        | <b>9</b>           |
| LA75                           | 123         | <b>68</b>      | 113            | 90              | 82                 |

Table 12: Dataset 3 (Comparison with other tools) : All statistics are based on contigs of size  $\geq 500$  bp, unless otherwise noted (e.g., "# contigs ( $\geq 0$  bp)" and "Total length ( $\geq 0$  bp)" include all contigs).

| Assembly                       | original       | BIGMAC         | finisherSC_e2e | jelly_e2e       | SSPACE_e2e         |
|--------------------------------|----------------|----------------|----------------|-----------------|--------------------|
| # contigs ( $\geq 0$ bp)       | 185            | 145            | 162            | 133             | <b>97</b>          |
| # contigs ( $\geq 1000$ bp)    | 185            | 140            | 162            | 133             | <b>97</b>          |
| Total length ( $\geq 0$ bp)    | 17393660       | 13912664       | 17391031       | <b>18003698</b> | 17738519           |
| Total length ( $\geq 1000$ bp) | 17393660       | 13911796       | 17391031       | <b>18003698</b> | 17738519           |
| # contigs                      | 185            | 140            | 162            | 133             | <b>97</b>          |
| Largest contig                 | 3968563        | 3968563        | 3968563        | 3971059         | <b>4319145</b>     |
| Total length                   | 17393660       | 13911796       | 17391031       | <b>18003698</b> | 17738519           |
| Reference length               | 7883268        | 7883268        | 7883268        | 7883268         | 7883268            |
| GC (%)                         | 61.18          | 60.98          | 61.19          | 61.19           | 61.18              |
| Reference GC (%)               | 61.71          | 61.71          | 61.71          | 61.71           | 61.71              |
| N50                            | 257044         | 359704         | 996532         | 1103847         | <b>1266912</b>     |
| NG50                           | 3968563        | 3968563        | 3968563        | 3971059         | <b>4319145</b>     |
| N75                            | 82370          | 99878          | 97964          | 128718          | <b>290104</b>      |
| NG75                           | 3924590        | 517104         | 3924590        | 3927083         | <b>3985906</b>     |
| L50                            | 5              | 7              | <b>3</b>       | <b>3</b>        | <b>3</b>           |
| LG50                           | 1              | 1              | 1              | 1               | 1                  |
| L75                            | 38             | 27             | 27             | 19              | <b>10</b>          |
| LG75                           | <b>2</b>       | 5              | <b>2</b>       | <b>2</b>        | <b>2</b>           |
| # misassemblies                | 26             | 14             | 25             | 27              | 43                 |
| # misassembled contigs         | 20             | 5              | 17             | 21              | 23                 |
| Misassembled contigs length    | 5470082        | <b>4328506</b> | 5465644        | 9434182         | 10736561           |
| # local misassemblies          | <b>2</b>       | <b>2</b>       | <b>2</b>       | <b>2</b>        | 5                  |
| # unaligned contigs            | 118 + 0 part   | 115 + 2 part   | 99 + 0 part    | 66 + 14 part    | <b>50 + 0 part</b> |
| Unaligned length               | 5585886        | <b>5553281</b> | 5602837        | 6149028         | 5791170            |
| Genome fraction (%)            | <b>99.983</b>  | 99.982         | <b>99.983</b>  | <b>99.983</b>   | <b>99.983</b>      |
| Duplication ratio              | 1.498          | <b>1.060</b>   | 1.496          | 1.504           | 1.516              |
| # N's per 100 kbp              | <b>0.00</b>    | <b>0.00</b>    | <b>0.00</b>    | <b>0.00</b>     | 1944.13            |
| # mismatches per 100 kbp       | 0.18           | 2.30           | <b>0.16</b>    | 0.60            | 0.18               |
| # indels per 100 kbp           | 8.70           | 23.60          | <b>5.14</b>    | 6.39            | 8.70               |
| Largest alignment              | 3924590        | 1719755        | 3924590        | <b>3925633</b>  | 3924590            |
| NA50                           | 137772         | <b>284436</b>  | 152488         | 107893          | 126445             |
| NGA50                          | <b>1719755</b> | 576251         | <b>1719755</b> | <b>1719755</b>  | <b>1719755</b>     |
| NGA75                          | 1452284        | 517104         | 1452284        | <b>1453076</b>  | 1452284            |
| LA50                           | 11             | <b>10</b>      | <b>10</b>      | 13              | 12                 |
| LGA50                          | <b>2</b>       | 4              | <b>2</b>       | <b>2</b>        | <b>2</b>           |
| LGA75                          | <b>3</b>       | 7              | <b>3</b>       | <b>3</b>        | <b>3</b>           |
